# Supplementary material
Source: PubMed Central journal article supplement (PMC8809311)
Supplement: KID.0000212020SupplementaryData1.pdf [file KID.0000212020SupplementaryData1.pdf]

**Supplemental Material:**

Supplemental Table 1 – Buffer composition for CCV isolation protocol

Supplemental Table 2 – Podocyte CCV LC-MS results and comparison to the published HeLa cell CCV proteome

Supplemental Figure 1 - Validation of enriched DTR-podocytes

**Supplemental Table 1. Buffer composition for CCV isolation protocol.** Composition of Buffer A 10x, 1x, protease inhibitor cocktail, and D<sub>2</sub>O sucrose solution.

| <b>Solution</b>                                 | <b>Chemicals</b>                                                                                                                                                                                                                                                                         | <b>Amount</b>                                                                                                                                                                                                     |
|-------------------------------------------------|------------------------------------------------------------------------------------------------------------------------------------------------------------------------------------------------------------------------------------------------------------------------------------------|-------------------------------------------------------------------------------------------------------------------------------------------------------------------------------------------------------------------|
| <b>Buffer A 10x</b>                             | <ul style="list-style-type: none"> <li>▪ 2-(N-morpholino)ethanesulfonic acid (MES; 1M final)</li> <li>▪ Ethylene glycol bis(β-aminoethylether)-N,N,N',N'-tetraacetic acid (EGTA) (200 mM)</li> <li>▪ MgCl<sub>2</sub> (2 M)</li> <li>▪ NaOH (10 M)</li> <li>▪ dH<sub>2</sub>O</li> </ul> | <ul style="list-style-type: none"> <li>▪ 19.52 g (1M final)</li> <li>▪ 5 ml (10 mM final)</li> <li>▪ 0.25 ml (5 mM final)</li> <li>▪ Adjust to pH 6.5</li> <li>▪ Start with 80 ml, add to 100 ml total</li> </ul> |
| <b>Buffer A 1x</b>                              | <ul style="list-style-type: none"> <li>▪ Buffer A 10x</li> <li>▪ NaOH (1 M)</li> <li>▪ dH<sub>2</sub>O</li> </ul>                                                                                                                                                                        | <ul style="list-style-type: none"> <li>▪ 50 ml</li> <li>▪ Adjust to pH 6.5</li> <li>▪ Start with 400 ml, add to 500 ml total</li> </ul>                                                                           |
| <b>complete protease inhibitor cocktail 25x</b> | <ul style="list-style-type: none"> <li>▪ complete (Roche)</li> <li>▪ ddH<sub>2</sub>O</li> </ul>                                                                                                                                                                                         | <ul style="list-style-type: none"> <li>▪ 1 tablet</li> <li>▪ 2 ml</li> </ul>                                                                                                                                      |
| <b>D<sub>2</sub>O-sucrose solution</b>          | <ul style="list-style-type: none"> <li>▪ D<sub>2</sub>O</li> <li>▪ Sucrose</li> <li>▪ Buffer A 10x</li> </ul>                                                                                                                                                                            | <ul style="list-style-type: none"> <li>▪ Start with 5 ml, add to 10 ml total</li> <li>▪ 0.8 g (8% w/v final)</li> <li>▪ 1ml</li> </ul>                                                                            |

**Supplemental Table 2. Podocyte CCV LC-MS results and comparison to the published HeLa cell CCV proteome.** Sheet 1: Raw LC-MS readout of the podocyte CCV fraction ranked by Mascot score. Sheet 2: Top 520 proteins ranked by emPAI. Sheet 3: MS Dataset of HeLa cell CCVs from Borner et al.(15). Sheet 4: Proteins in podocyte CCVs not mentioned in HeLa dataset. Sheet 5: Proteins mentioned in both datasets. Sheet 6: Proteins mentioned in both datasets with a control/mock ratio of >1.46. Sheet 7: Overview over 36 survivors.

**Supplemental Figure 1. Validation of enriched DTR-podocytes.** (A) qPCR of genes of interest (GOI) for nephrin, WT1, and GAPDH in DTR podocytes and whole kidney lysates. (B) Representative immunoblots of nephrin, desmin, ve-cadherin, WT1, and GAPDH.

A

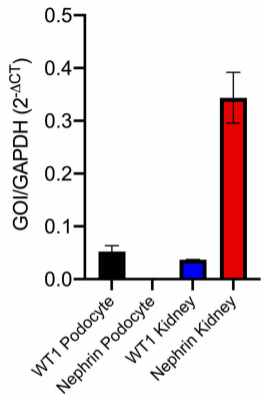

B

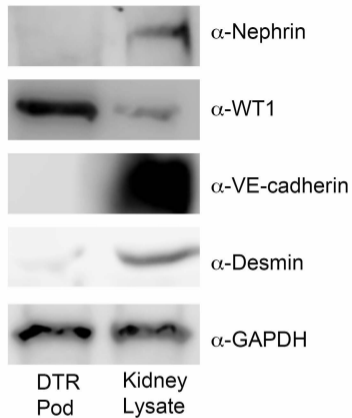

Supplemental Figure 1
